# Supplementary material for: Subtype Distribution of Blastocystis Isolates in Sebha, Libya
Source: PubMed Central journal article supplement (PMC3869855; doi:10.1371/journal.pone.0084372), 2013-12-20
Supplement: pone.0084372.s002.pdf [file pone.0084372.s002.pdf]

**Table S2.** Patient record and percentage homology of infected *Blastocystis* subtypes with their closest match reference from Genbank

| Patient no. -<br>age/ gender                           | <i>Blastocystis</i> from<br>symptomatic patient |                      | Genbank reference <i>Blastocystis</i><br>isolate, host (Accession no.) |                                                            |                             |                    | <i>Blastocystis</i> from<br>asymptomatic patient |                        | Patient no. -<br>age/ gender |
|--------------------------------------------------------|-------------------------------------------------|----------------------|------------------------------------------------------------------------|------------------------------------------------------------|-----------------------------|--------------------|--------------------------------------------------|------------------------|------------------------------|
|                                                        | Isolate<br>designation                          | % homology           | ST                                                                     | Clones sequences with a single <i>Blastocystis</i> subtype |                             | ST                 | %homology                                        | Isolate<br>designation |                              |
|                                                        |                                                 |                      |                                                                        | clone                                                      |                             |                    |                                                  |                        |                              |
| L1-15/F                                                | <b>LFS-1</b>                                    | (100)                |                                                                        | <b>(a,b,c)</b>                                             | HJ96A-29, human (AB070989)  | (a,b,c)            | (100)                                            | LF-30                  | L20-23/F                     |
| L16-38/F                                               | LFS-2                                           | (100)                |                                                                        | (a,b,c)                                                    | MJ99-424, monkey (AB107967) | (a,b,c)            | (100)                                            | LM-31                  | L28-13/M                     |
| L17-60/F                                               | LFS-3                                           | (100)                |                                                                        | (a,b,c)                                                    |                             | (a,b,c)            | (100)                                            | LF-32                  | L25-43/F                     |
| L18-9/F                                                | LFS-4                                           | (100)                |                                                                        | (a,b,c)                                                    |                             | (a,b) <b>(c,d)</b> | (100) <b>(99.7)</b>                              | <b>LM-33</b>           | L22-75/M                     |
| L12-25/M                                               | <b>LMS-5</b>                                    | (100) <b>(99.7)</b>  |                                                                        | (a,b) <b>(c,d)</b>                                         |                             | (a,b,c)            | (100)                                            | LM-34                  | L24-50/M                     |
| L13-45/F                                               | <b>LFS-6</b>                                    | <b>(98.7)</b> (98.5) |                                                                        | <b>(a,b)</b> c,d)                                          |                             | (a,c) <b>(b,d)</b> | (98.7) <b>(98.5)</b>                             | <b>LM-35</b>           | L26-28/M                     |
| L31-9/M                                                | LMS-7                                           | (100)                |                                                                        | (a,b,c)                                                    |                             | (a,b,c)            | (100)                                            | LF-36                  | L40-43/F                     |
| L32-5/M                                                | LMS-8                                           | (100)                | ST1                                                                    | (a,b,c)                                                    |                             | (a,b,c)            | ST1 (100)                                        | LF-37                  | L41-28/F                     |
| L33-28M                                                | LMS-9                                           | (100)                |                                                                        | (a,b,c)                                                    |                             |                    |                                                  |                        |                              |
| L34-45/F                                               | LFS-10                                          | (100)                |                                                                        | (a,b,c)                                                    |                             |                    |                                                  |                        |                              |
| L39-40/F                                               | LFS-11                                          | (100)                |                                                                        | (a,b,c)                                                    |                             |                    |                                                  |                        |                              |
| L42-50/M                                               | LMS-12                                          | (100)                |                                                                        | (a,b,c)                                                    |                             |                    |                                                  |                        |                              |
| L43-34/F                                               | LFS-13                                          | (100)                |                                                                        | (a,b,c)                                                    |                             |                    |                                                  |                        |                              |
| L44-38/F                                               | LFS-14                                          | (100)                |                                                                        | (a,b,c)                                                    |                             |                    |                                                  |                        |                              |
| L45-46/F                                               | LFS-15                                          | (100)                |                                                                        | (a,b,c)                                                    |                             |                    |                                                  |                        |                              |
| L35-24M                                                | LMS-16                                          | (99.7)               |                                                                        | (a,b,c)                                                    | MJ99-116, monkey (AB107969) | (a,b,c)            | (99.7)                                           | LM-38                  | L19-20/M                     |
| L8-64/M                                                | <b>LMS-17</b>                                   | (99.7)               |                                                                        | <b>(a,b,c)</b>                                             |                             | (a,b,c)            | (99.7)                                           | LM-39                  | L21-18/M                     |
| L2-17/M                                                | <b>LMS-18</b>                                   | (98.9)               | ST2                                                                    | <b>(a,b,c)</b>                                             |                             | (a,b,c)            | ST2 (98.9)                                       | LM-40                  | L6-27/M                      |
| L36-15/M                                               | LMS-19                                          | (98.9)               |                                                                        | (a,b,c)                                                    |                             | (a,b,c)            | (98.9)                                           | LF-41                  | L14-27/F                     |
| L37-33/F                                               | LFS-20                                          | (98.9)               |                                                                        | (a,b,c)                                                    |                             | (a,d) <b>(b,c)</b> | (98.9) <b>(98.7)</b>                             | <b>LM-42</b>           | L5-27/M                      |
|                                                        |                                                 |                      |                                                                        |                                                            |                             | (a,b,c)            | (99.7)                                           | LM-43                  | L38-23/M                     |
| L7-25/M                                                | <b>LMS-21</b>                                   | (100)                |                                                                        | <b>(a,b,c)</b>                                             | PJ99-162, pig (AB107963)    |                    |                                                  |                        |                              |
| L11-31/F                                               | LFS-22                                          | (100)                |                                                                        | (a,b,c)                                                    |                             |                    |                                                  |                        |                              |
| L15-34/M                                               | LMS-23                                          | (100)                |                                                                        | (a,b,c)                                                    |                             |                    |                                                  |                        |                              |
| L23-34/M                                               | LMS-24                                          | (100)                |                                                                        | (a,b,c)                                                    |                             |                    |                                                  |                        |                              |
| L9-48/M                                                | LMS-25                                          | (100)                | ST3                                                                    | (a,b,c)                                                    |                             |                    |                                                  |                        |                              |
| L10-28/M                                               | <b>LMS-26</b>                                   | <b>(99.1)</b> (100)  |                                                                        | <b>(a,b)</b> (c,d)                                         |                             |                    |                                                  |                        |                              |
| L29-30/M                                               | LMS-27                                          | (100)                |                                                                        | (a,b,c)                                                    |                             |                    |                                                  |                        |                              |
| L30-19/F                                               | LFS-28                                          | (100)                |                                                                        | (a,b,c)                                                    |                             |                    |                                                  |                        |                              |
| clones sequences with two <i>Blastocystis</i> subtypes |                                                 |                      |                                                                        |                                                            |                             |                    |                                                  |                        |                              |
| L27-45/M                                               | <b>LMS-29</b>                                   | <b>(98.9)</b>        | ST1                                                                    | <b>(a,b)</b>                                               | MJ99-424, monkey (AB107967) |                    |                                                  |                        |                              |
|                                                        |                                                 | <b>(99.7)</b>        | ST3                                                                    | <b>(c,d)</b>                                               | PJ99-162, pig (AB107963)    |                    |                                                  |                        |                              |
|                                                        |                                                 |                      |                                                                        |                                                            | MJ99-424, monkey (AB107967) | (a,b)              | ST1 (99.7)                                       | <b>LM-44</b>           | L3-20/M                      |
|                                                        |                                                 |                      |                                                                        |                                                            | MJ99-116, monkey (AB107969) | <b>(c,d)</b>       | ST2 (98.3)                                       |                        |                              |
|                                                        |                                                 |                      |                                                                        |                                                            | MJ99-424, monkey (AB107967) | <b>(a,b)</b>       | ST1 (99.7)                                       | <b>LF-45</b>           | L4-33/F                      |
|                                                        |                                                 |                      |                                                                        |                                                            | MJ99-116, monkey (AB107969) | (c,d)              | ST2 (98.3)                                       |                        |                              |

Designation: Subtype of *Blastocystis* (ST), Libyan (L), female (F), male (M). *Blastocystis* isolate from Libyan male (LM), male with symptom (LMS), female (LF), female with symptom (LFS). Isolate clones sequences (bold font) and the reference isolates (accession number) were used in the phylogenetic analysis. Specimens L18-9/F and L5-27/M were co-infected with *Giardia intestinalis* and *Cryptosporidium* species, respectively.
